# Supplementary material for: Enhanced cycling performance of B-doped LiNi 0.8 Co 0.1 Mn 0.1 O 2 cathodes prepared by the solid-state method
Source: Royal Society of Chemistry journal article supplement (doi:10.1039/d4ta06100d), 2024-01-01
Supplement: d4ta06100d1.pdf [file d4ta06100d1.pdf]

Electronic Supplementary Information (ESI)

# Enhanced Cycling Performance of B-doped $\text{LiNi}_{0.8}\text{Co}_{0.1}\text{Mn}_{0.1}\text{O}_2$ Cathode Prepared by Solid-state Method

Saijing Wang,<sup>ab</sup> Maolin Zhang,<sup>\*ab</sup> Yangxi Yan,<sup>ab</sup> Dongyan Zhang,<sup>ab</sup> Yuan Wang,<sup>ab</sup> Gang Cao,<sup>ab</sup> Jianzhang Shi,<sup>ab</sup> Xiaofei Sun<sup>c</sup>

<sup>a</sup> School of Advanced Materials and Nanotechnology, Xidian University, Xi'an, 710071, China

<sup>b</sup> Shaanxi Key Laboratory of High-Orbits-Electron Materials and Protection Technology for Aerospace, Xidian University, Xi'an, 710071, China

<sup>c</sup> State Key Laboratory for Manufacturing System Engineering, School of Mechanical Engineering, Xi'an Jiaotong University, Xi'an, 710049, China

E-mail addresses: mlzhang@xidian.edu.cn

## Supplementary figures

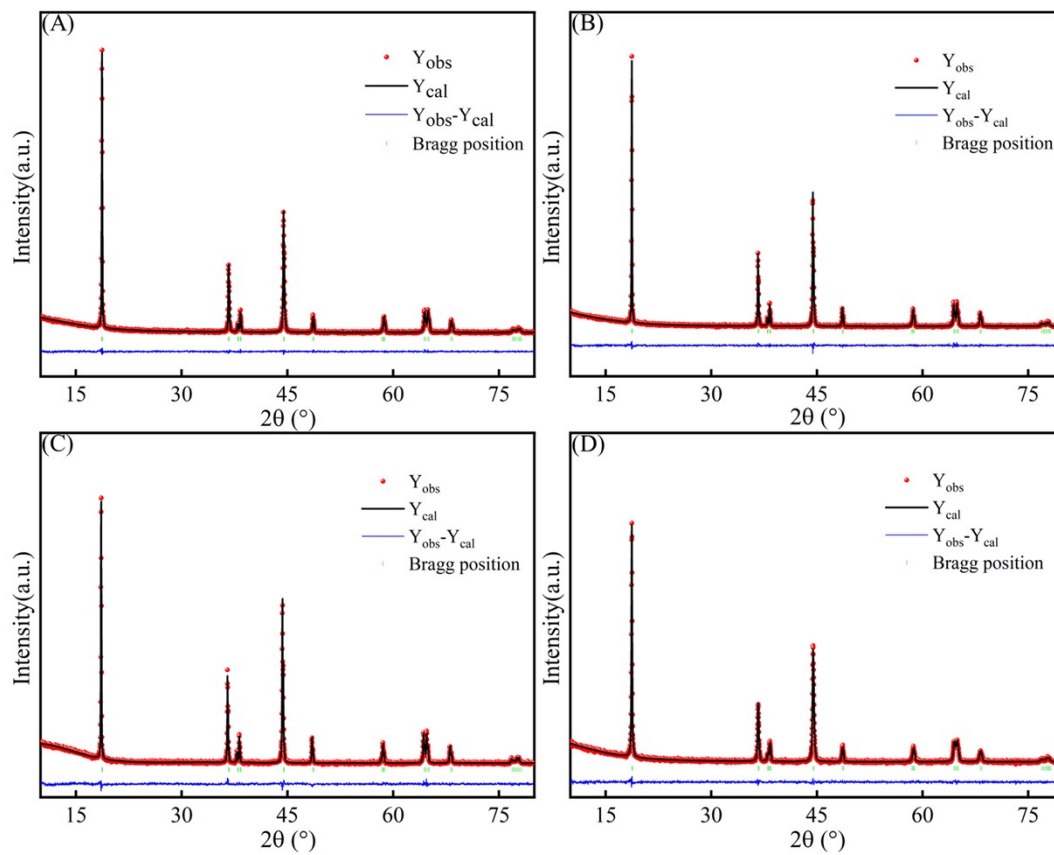

Fig. S1 Rietveld refinement of (A) S0, (B) S1, (C) S2, and (D) S3.

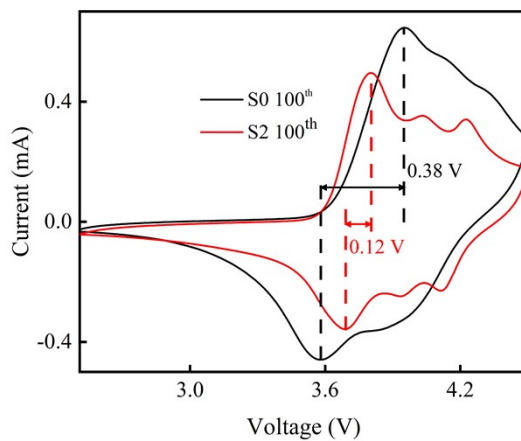

Fig. S2 CV curves of S0 and S2 after 100 cycles.

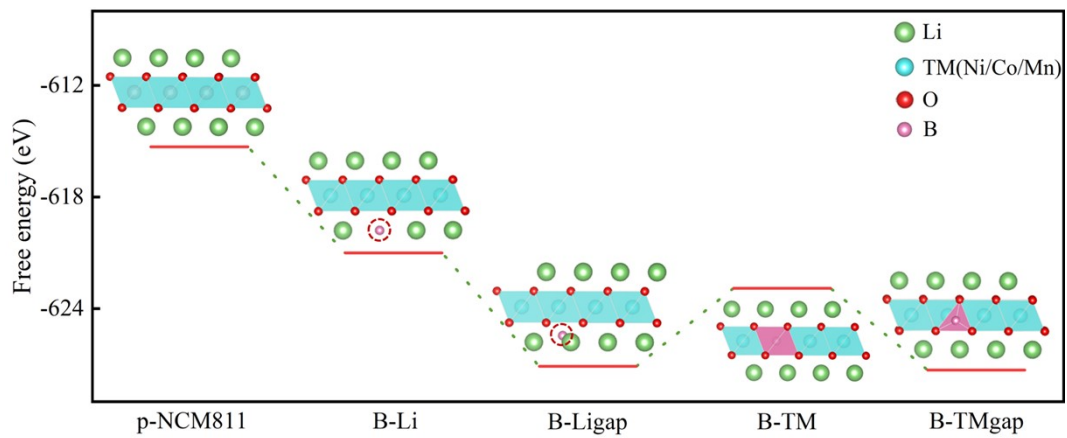

Fig. S3 Free energy of B-doping varies at different positions.

## Supplementary tables

Table S1 Rietveld XRD analysis of S0-S3 samples

| Sample             |                     | S0      | S1      | S2      | S3      |
|--------------------|---------------------|---------|---------|---------|---------|
| Lattice parameters | a(Å)                | 2.8715  | 2.8725  | 2.8727  | 2.8720  |
|                    | c(Å)                | 14.1994 | 14.2073 | 14.2091 | 14.2020 |
|                    | c/a                 | 4.9449  | 4.9460  | 4.9462  | 4.9450  |
|                    | I(003)/I(104)       | 1.78    | 1.86    | 2.03    | 1.92    |
|                    | Ni/Li(%)            | 4.67    | 4.52    | 3.76    | 4.59    |
|                    | R <sub>p</sub> (%)  | 2.72    | 2.54    | 2.61    | 2.70    |
|                    | R <sub>wp</sub> (%) | 3.44    | 3.20    | 3.31    | 3.51    |

Table S2 Comparison of performance of LiNi<sub>x</sub>Co<sub>y</sub>Mn(Al)<sub>1-x-y</sub>O<sub>2</sub> (x ≥ 0.8) cathodes obtained by the solid-state method

| Cathode                                                                     | Strategy                     | Retention (25°C)                     | Voltage (V)    | Refs.            |
|-----------------------------------------------------------------------------|------------------------------|--------------------------------------|----------------|------------------|
| LiNi <sub>0.8</sub> Co <sub>0.1</sub> Mn <sub>0.1</sub> O <sub>2</sub>      | Optimize preparation process | 67.8% (0.2 C, 100 <sup>th</sup> )    | 2.7-4.3        | 52               |
| LiNi <sub>0.8</sub> Co <sub>0.15</sub> Al <sub>0.05</sub> O <sub>2</sub>    | Y-doped                      | 84.7% (0.5 C, 50 <sup>th</sup> )     | 2.8-4.2        | 53               |
|                                                                             | Ca-doped                     | 87.7% (0.5 C, 50 <sup>th</sup> )     |                |                  |
| LiNi <sub>0.88</sub> Co <sub>0.09</sub> Al <sub>0.03</sub> O <sub>2</sub>   | Mn-doped                     | 88.4% (1 C, 100 <sup>th</sup> )      | 2.5-4.3        | 54               |
| LiNi <sub>0.9</sub> Co <sub>0.07</sub> Al <sub>0.03</sub> O <sub>2</sub>    | Zr-doped                     | 84.9% (0.5 C, 100 <sup>th</sup> )    | 2.8-4.3        | 55               |
| LiNi <sub>0.815</sub> Co <sub>0.15</sub> Al <sub>0.035</sub> O <sub>2</sub> | Br-doped                     | 73.7% (0.5 C, 100 <sup>th</sup> )    | 2.8-4.3        | 56               |
| LiNi <sub>0.8</sub> Co <sub>0.1</sub> Mn <sub>0.1</sub> O <sub>2</sub>      | La/Al co-doped               | 75.4% (1 C, 100 <sup>th</sup> )      | 2.7-4.3        | 57               |
| LiNi <sub>0.85</sub> Co <sub>0.1</sub> Al <sub>0.05</sub> O <sub>2</sub>    | Na/Nb co-doped               | 94.3% (0.5 C, 100 <sup>th</sup> )    | 2.8-4.5        | 58               |
| LiNi <sub>0.8</sub> Co <sub>0.15</sub> Al <sub>0.05</sub> O <sub>2</sub>    | polyanion/Mn co-doped        | 85.5% (1 C, 100 <sup>th</sup> )      | 2.7-4.3        | 59               |
| <b>LiNi<sub>0.8</sub>Co<sub>0.1</sub>Mn<sub>0.1</sub>O<sub>2</sub></b>      | <b>B-doped</b>               | <b>90.7% (1 C, 100<sup>th</sup>)</b> | <b>2.7-4.3</b> | <b>This work</b> |

Table S3 Comparison of performance of LiNi<sub>x</sub>Co<sub>y</sub>Mn(Al)<sub>1-x-y</sub>O<sub>2</sub> (x ≥ 0.8) cathodes prepared by various doping methods and elements

| Cathode                                                                     | Strategy                | Retention (25°C)                 | Voltage (V) | Refs. |
|-----------------------------------------------------------------------------|-------------------------|----------------------------------|-------------|-------|
| LiNi <sub>0.815</sub> Co <sub>0.15</sub> Al <sub>0.035</sub> O <sub>2</sub> | Zn-doped                | 92% (1 C, 100 <sup>th</sup> )    | 2.7-4.3     | 60    |
|                                                                             | co-precipitation        |                                  |             |       |
| LiNi <sub>0.8</sub> Co <sub>0.1</sub> Mn <sub>0.1</sub> O <sub>2</sub>      | Ta-doped                | 90% (1/3 C, 100 <sup>th</sup> )  | 2.7-4.3     | 61    |
|                                                                             | co-precipitation        |                                  |             |       |
| LiNi <sub>0.84</sub> Co <sub>0.1</sub> Mn <sub>0.06</sub> O <sub>2</sub>    | V-doped                 | 88.1% (0.5 C, 80 <sup>th</sup> ) | 2.7-4.3     | 62    |
|                                                                             | co-precipitation        |                                  |             |       |
| LiNi <sub>0.83</sub> Co <sub>0.11</sub> Mn <sub>0.06</sub> O <sub>2</sub>   | La-Nd-Sm-Eu-Gd-Zr-doped | 90% (1 C, 100 <sup>th</sup> )    | 2.7-4.3     | 63    |
|                                                                             | co-precipitation        |                                  |             |       |
| LiNi <sub>0.8</sub> Co <sub>0.1</sub> Mn <sub>0.1</sub> O <sub>2</sub>      | Nb-doped sol-gel method | 94.6% (1 C, 100 <sup>th</sup> )  | 2.7-4.3     | 23    |

|                                                                               |                                       |                                      |                |                  |
|-------------------------------------------------------------------------------|---------------------------------------|--------------------------------------|----------------|------------------|
| $\text{LiNi}_{0.8}\text{Co}_{0.1}\text{Mn}_{0.1}\text{O}_2$                   | Nb-doped<br>sol-gel method            | 95.4% (0.5 C, 100 <sup>th</sup> )    | 2.7-4.3        | 64               |
| $\text{LiNi}_{0.88}\text{Co}_{0.1}\text{Al}_{0.02}\text{O}_2$                 | B-doped<br>co-precipitation           | 90.4% (1 C, 100 <sup>th</sup> )      | 2.7-4.3        | 35               |
| $\text{LiNi}_{0.9}\text{Co}_{0.05}\text{Mn}_{0.05}\text{O}_2$                 | B-doped<br>co-precipitation           | 91.5% (0.5 C, 100 <sup>th</sup> )    | 2.38-3.68      | 33               |
| $\text{LiNi}_{0.885}\text{Co}_{0.1}\text{Al}_{0.015}\text{O}_2$               | B-doped<br>co-precipitation           | 93.5% (0.5 C, 100 <sup>th</sup> )    | 2.7-4.3        | 65               |
| $\text{LiNi}_{0.85}\text{Co}_{0.1}\text{Mn}_{0.05}\text{O}_2$                 | B-doped<br>co-precipitation           | 94.2%(1 C, 100 <sup>th</sup> )       | 3.0-4.3        | 31               |
| <b><math>\text{LiNi}_{0.8}\text{Co}_{0.1}\text{Mn}_{0.1}\text{O}_2</math></b> | <b>B-doped<br/>solid-state method</b> | <b>90.7% (1 C, 100<sup>th</sup>)</b> | <b>2.7-4.3</b> | <b>This work</b> |

Table S4 EIS fitting data and calculation results of  $\text{D}_{\text{Li}^+}$

| Sample            | S0                      |                         |                                                | S2                      |                         |                                                |
|-------------------|-------------------------|-------------------------|------------------------------------------------|-------------------------|-------------------------|------------------------------------------------|
|                   | $R_{\text{sf}}(\Omega)$ | $R_{\text{ct}}(\Omega)$ | $\text{D}_{\text{Li}^+}(\text{cm}^2/\text{s})$ | $R_{\text{sf}}(\Omega)$ | $R_{\text{ct}}(\Omega)$ | $\text{D}_{\text{Li}^+}(\text{cm}^2/\text{s})$ |
| 1 <sup>st</sup>   | 58.7                    | 278.4                   | $3.8 \times 10^{-13}$                          | 79.4                    | 134.6                   | $6.4 \times 10^{-13}$                          |
| 100 <sup>th</sup> | 281.7                   | 584.4                   | $2.0 \times 10^{-13}$                          | 262.7                   | 382.8                   | $3.1 \times 10^{-13}$                          |
